# Supplementary material
Source: PubMed Central journal article supplement (PMC9753269)

## Supplemental figures.

Scatterplots with the individual data points of the correlation between NE levels and n-cfDNA (Alu 115 and Alu 247)

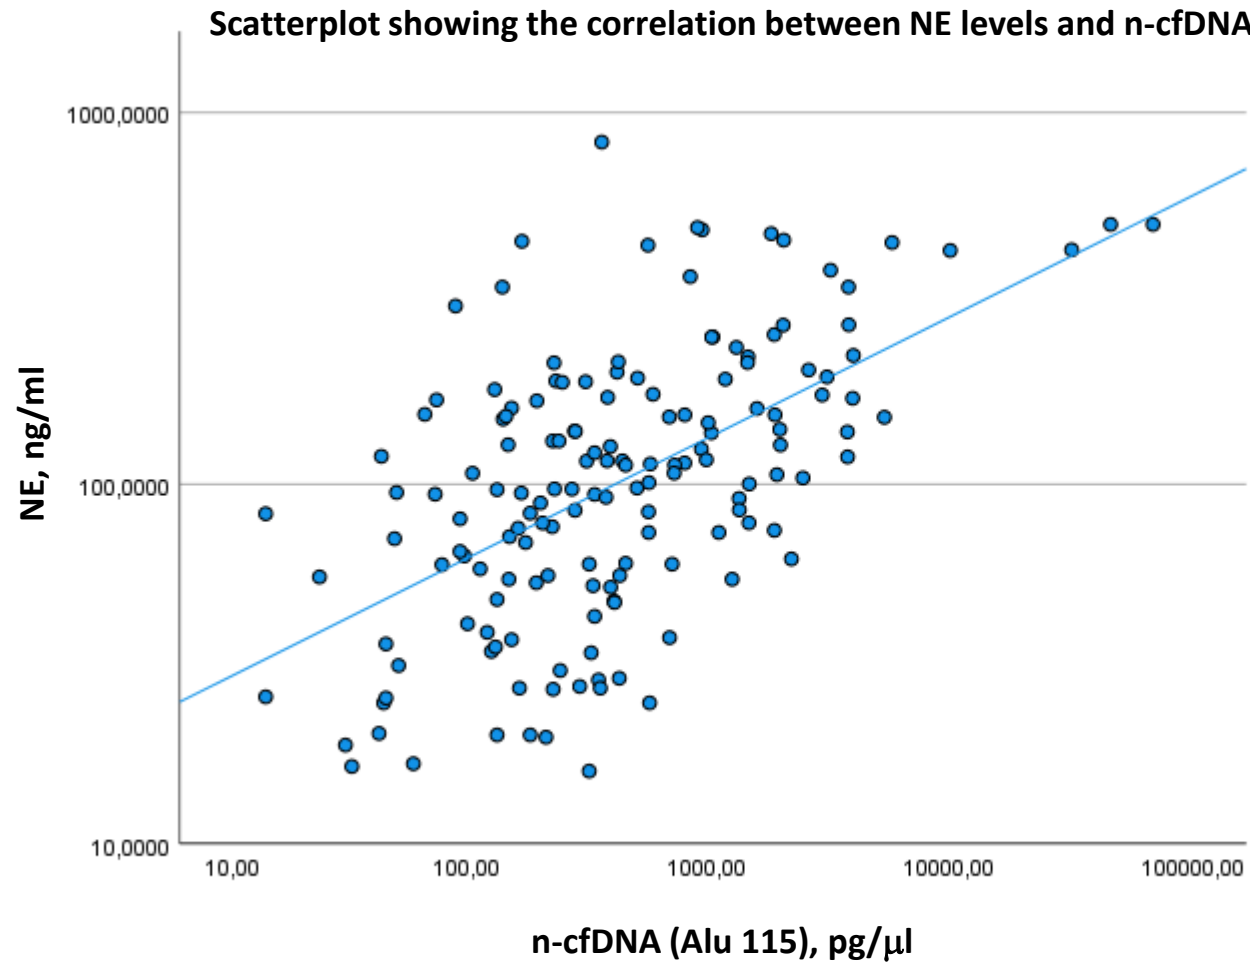

Scatterplot showing the correlation between NE levels and n-cfDNA (Alu 247)

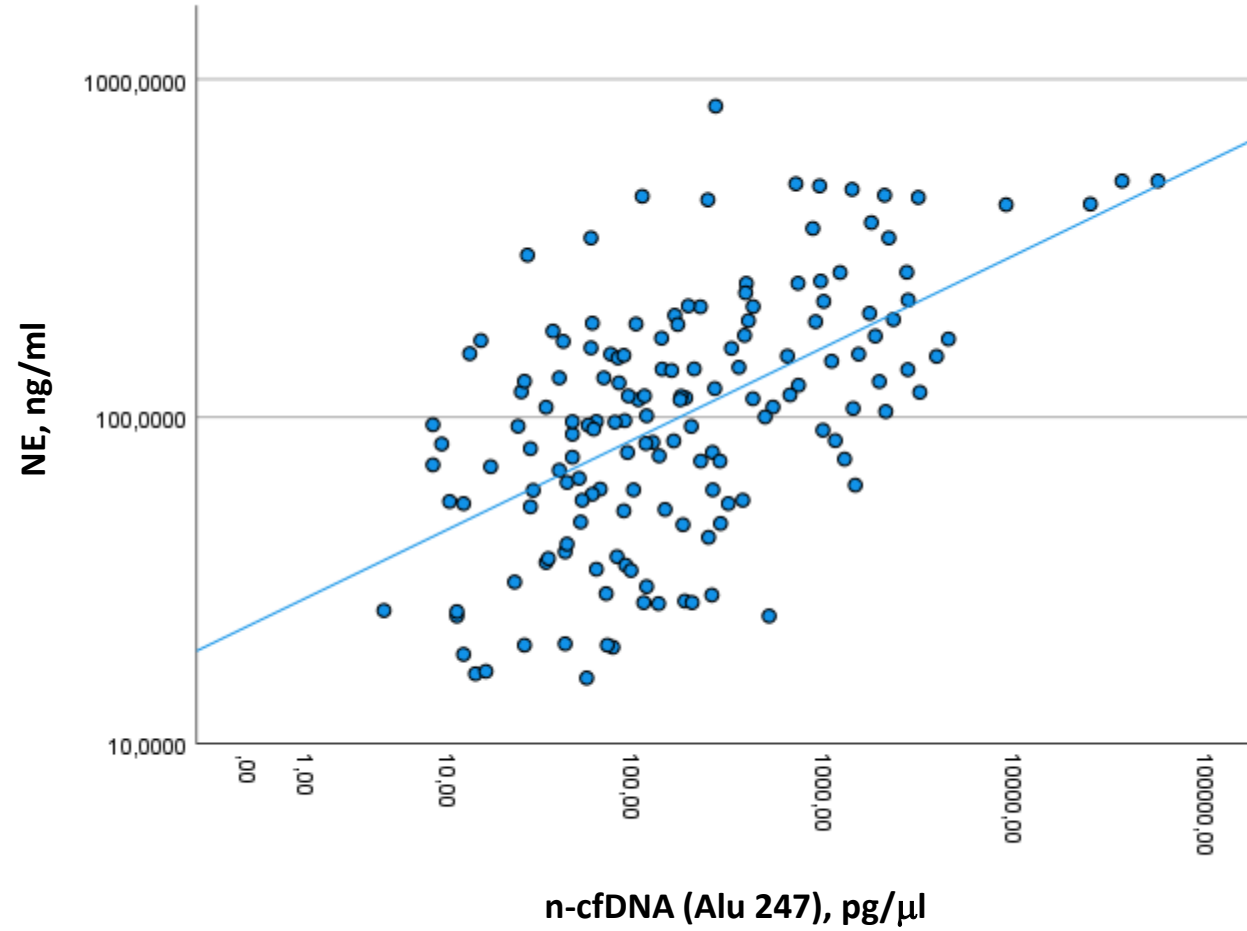

Scatterplot showing the correlation between NE levels and n-cfDNA integrity (Alu 247/115)

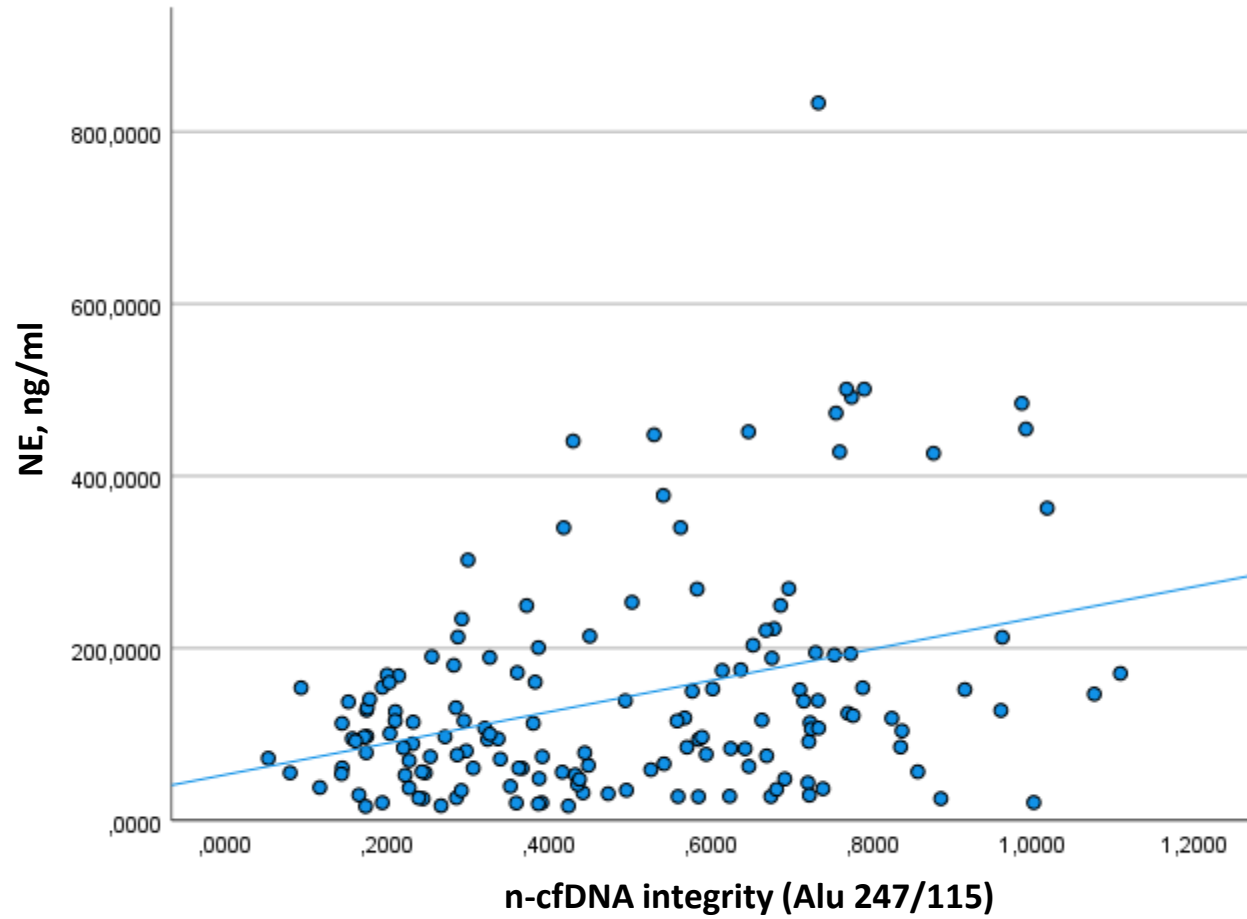

Supplement: 12979_2022_315_MOESM6_ESM.pdf [file 12979_2022_315_MOESM6_ESM.pdf]
